# Supplementary material for: Synthesis, characterisation, and catalytic evaluation of hierarchical faujasite zeolites: milestones, challenges, and future directions
Source: Royal Society of Chemistry journal article supplement (doi:10.1039/c5cs00520e), 2015-08-27
Supplement: c5cs00520e3.pdf [file c5cs00520e3.pdf]

# Synthesis, characterisation, and catalytic evaluation of hierarchical faujasite zeolites: milestones, challenges, and future directions

D. Verboekend,\* N. Nuttens, R. Locus, J. Van Aelst, P. Verolme,

J. C. Groen, J. Pérez-Ramírez, B. F. Sels

**Table SI1:** Sources to make **Figures 2** and **4**.

| Pathway         | Source                                                                                                                                                                                                                                                                                                |
|-----------------|-------------------------------------------------------------------------------------------------------------------------------------------------------------------------------------------------------------------------------------------------------------------------------------------------------|
| <b>Figure 2</b> |                                                                                                                                                                                                                                                                                                       |
| (a)             | A. Inayat, I. Knoke, E. Spiecker and W. Schwieger, <i>Angew. Chem. Int. Ed.</i> , 2012, <b>51</b> , 1962-1965.                                                                                                                                                                                        |
| (b), (d), (j)   | D. Verboekend, T. C. Keller, S. Mitchell and J. Pérez-Ramírez, <i>Adv. Funct. Mater.</i> , 2013, <b>23</b> , 1923-1934.                                                                                                                                                                               |
| (c)             | US Pat., 20130183230A1, 2013.                                                                                                                                                                                                                                                                         |
| (e)             | H. Awala, J.-P. Gilson, R. Retoux, P. Boullay, J.-M. Goupil, V. Valtchev and S. Mintova, <i>Nat. Mater.</i> , 2015, <b>14</b> , 447-451.                                                                                                                                                              |
| (f)             | Z. Qin, B. Shen, X. Gao, F. Lin, B. Wang and C. Xu, <i>J. Catal.</i> , 2011, <b>278</b> , 266-275.                                                                                                                                                                                                    |
| (g), (m)        | D. Verboekend, G. Vilé and J. Pérez-Ramírez, <i>Adv. Funct. Mater.</i> , 2012, <b>22</b> , 916-928.                                                                                                                                                                                                   |
| (h)             | C. Martínez, D. Verboekend, J. Pérez-Ramírez and A. Corma, <i>Catal. Sci. Technol.</i> , 2013, <b>3</b> , 972-981.                                                                                                                                                                                    |
| (i)             | G. T. Kerr, <i>J. Phys. Chem.</i> , 1968, <b>72</b> , 2594-2596.                                                                                                                                                                                                                                      |
| (k), (l)        | K. P. de Jong, J. Zečević, H. Friedrich, P. E. de Jongh, M. Bulut, S. van Donk, R. Kenmogne, A. Finiels, V. Hulea and F. Fajula, <i>Angew. Chem. Int. Ed.</i> , 2010, <b>49</b> , 10074-10078.                                                                                                        |
| (o)             | J. Van Aelst, A. Philippaerts, N. Nuttens, D. Verboekend, M. Kurttepel, E. Gobechiya, M. Haouas, S. P. Sree, J. F. M. Denayer, J. A. Martens, C. E. A. Kirschhock, F. Taulelle, S. Bals, G. V. Baron, P. A. Jacobs, B. F. Sels, <i>Adv. Funct. Mater.</i> , 2015, DOI:10.1002/adfm.201502772          |
| <b>Figure 4</b> |                                                                                                                                                                                                                                                                                                       |
| steam           | D. Verboekend, G. Vilé and J. Pérez-Ramírez, <i>Adv. Funct. Mater.</i> , 2012, <b>22</b> , 916-928.<br>K. P. de Jong, J. Zečević, H. Friedrich, P. E. de Jongh, M. Bulut, S. van Donk, R. Kenmogne, A. Finiels, V. Hulea and F. Fajula, <i>Angew. Chem. Int. Ed.</i> , 2010, <b>49</b> , 10074-10078. |
| base            | D. Verboekend, G. Vilé and J. Pérez-Ramírez, <i>Adv. Funct. Mater.</i> , 2012, <b>22</b> , 916-928.<br>D. Verboekend, T. C. Keller, S. Mitchell and J. Pérez-Ramírez, <i>Adv. Funct. Mater.</i> , 2013, <b>23</b> , 1923-1934.                                                                        |
| acid            | D. Verboekend, T. C. Keller, S. Mitchell and J. Pérez-Ramírez, <i>Adv. Funct. Mater.</i> , 2013, <b>23</b> , 1923-1934.                                                                                                                                                                               |
| bottom-up       | A. Inayat, I. Knoke, E. Spiecker and W. Schwieger, <i>Angew. Chem. Int. Ed.</i> , 2012, <b>51</b> , 1962-1965.<br>H. Awala, J.-P. Gilson, R. Retoux, P. Boullay, J.-M. Goupil, V. Valtchev and S. Mintova, <i>Nat. Mater.</i> , 2015, <b>14</b> , 447-451.                                            |
